# Supplementary material for: Infection and Coinfection of Porcine-Selected Viruses (PPV1 to PPV8, PCV2 to PCV4, and PRRSV) in Gilts and Their Associations with Reproductive Performance
Source: MDPI journal article supplement (doi:10.3390/vetsci11050185), 2024-04-24
Supplement: s1 [file s1]

**Table S1.** Primers and probes used in the present study for the detection of PPV1 through PPV7, PCV2, PCV3, and PRRSV through real-time PCR

| Primer/Probe                                     | Nucleotide sequence (5'-3')                                                                                        | Amplicon | Genbank position/Access number | Reference |
|--------------------------------------------------|--------------------------------------------------------------------------------------------------------------------|----------|--------------------------------|-----------|
| PCV2abF<br>PCV2abR<br>ProbePCV2a<br>ProbePCV2b/d | GCAGGGCCAGAATTCAACC<br>GGCGGTGGACATGATGAGA<br>FAM-GGGGACCAACAAAATCTCTATACCCTT-BHQ<br>Cy5-CTCAAACCCCGCTCTGTGCCC-BHQ | 123      | 1411-1534/MZ747121a            | [48]      |
| PCV3F<br>PCV3R<br>Probe PCV3                     | AGACGACCCTTATGCGGAAA<br>AACGGTGGGGTCATATGTGTTG<br>FAM-CTCACCAGGACAAAAGCCTCTTCTT-BHQ                                | 155      | 1448-1603/OL799306 b           | [49]      |
| PPV1F<br>PPV1R<br>Probe PPV1                     | GAAGACTGGATGATGACAGATCCA<br>TGCTGTTTTTGTCTTGCTAGAGTAA<br>FAM-AATGATGGCTCAAACCGGAGGAGA-BHQ                          | 120      | 1188-1308 KF913350c            | [47]      |
| PRRSVF<br>PRRSVR<br>Probe PRRVS                  | GTAAGTYGCRCTCCTTTGGGGRGTGT<br>GACGCCGRACGASAAAAYGCGTGGTTA<br>FAM-TACATTCTGGCCCTGCCCAAYC-TAMRA                      | 173      | 14607-/MN642104d               | [46]      |
| PPV2F<br>PPV2R                                   | AGCTCTGCGACAAGTGGG<br>GTCTACGGCCTGCAAGAA                                                                           | 186      | 235-421/MW051675e              | [10]      |
| PPV3F<br>PPV3R                                   | CAYGAYGAACGGTACGATGAAAT<br>GCGGTAAAACCTGTGAWAWTTGAAC                                                               | 222      | 2932-3154/ JF738367 f          | [41]      |
| PPV4F<br>PPV4R                                   | TATGTGGGCTGGGCAAGGAATGTC<br>GTTGCGGAATGCTATCAGGCTCTT                                                               | 416      | 1068-1771/GQ387500i            | [24]      |
| PPV5F<br>PPV5R                                   | GCATTGGTGTGTGTCTGTGTCC<br>GTGGCACATTGTACATGGGAG                                                                    | 344      | 1068-1412/JX896321j            | [24]      |
| PPV6F<br>PPV6R                                   | GGCTTCATAATCCCTCCAAAACCT<br>GCTCATCTTCTCTGTTTCTCCTG                                                                | 156      | 3369-3525/MW051672k            | [42]      |
| PPV7F<br>PPV7R                                   | GAGGCGGTGATGGAGCAGAT<br>CTCCAGGACCACCACATCCC                                                                       | 119      | 1170/MN326293.l1               | [43]      |

<sup>a-k</sup> Gen Bank reference sequence of each virus.

**Table S2.** Percent of positive farms and samples prevalence by real-time for PPVs (PPV1 through PPV7), PCV2, PCV3, and PRRSV.

| <b>Virus</b> | <b>% Positive farms (positive / all tested)</b> | <b>% Positive sera (positive / all tested)</b> |
|--------------|-------------------------------------------------|------------------------------------------------|
| <b>PRRSV</b> | 82.5 (33 / 40)                                  | 63.6 (149 / 234)                               |
| <b>PCV2</b>  | 85 (34 / 40)                                    | 53.4 (125 / 234)                               |
| <b>PCV3</b>  | 57.5 (23 / 40)                                  | 30.7 (72 / 234)                                |
| <b>PPV1</b>  | 17.5 (7 / 40)                                   | 14.5 (34 / 234)                                |
| <b>PPV2</b>  | 22.5 (9 / 40)                                   | 9.8 (23 / 234)                                 |
| <b>PPV3</b>  | 67.5 (27 / 40)                                  | 40.1 (94 / 234)                                |
| <b>PPV4</b>  | 15 (6 / 40)                                     | 4.2 (10 / 234)                                 |
| <b>PPV5</b>  | 40 (16 / 40)                                    | 20.5 (48 / 234)                                |
| <b>PPV6</b>  | 32.5 (13 / 40)                                  | 17 (40 / 234)                                  |
| <b>PPV7</b>  | 5 (2 / 40)                                      | 1.28 (3 / 234)                                 |

**Table S3.** Viral infection and coinfections in gilts at the herd level from 40 herds in Colombia.

| Detection status | Number of herds | Viral detection (number of herds)                                                                                                                                                                                                                                                      |
|------------------|-----------------|----------------------------------------------------------------------------------------------------------------------------------------------------------------------------------------------------------------------------------------------------------------------------------------|
| Single           | 0               | -                                                                                                                                                                                                                                                                                      |
| Double           | 3               | PCV2/PRRSV (1), PCV2/PPV6 (1), PPV1/PPV3 (1).                                                                                                                                                                                                                                          |
| Triple           | 9               | PCV2/PRRSV/PPV1 (2), PCV2/PPV5/PRRSV (2), PCV3/PRRSV/PPV1 (1), PCV3/PCV2/PRRSV (1), PCV2/PPV2/PRRSV (1), PPV2/PPV3/PRRSV (1), PCV2/PPV3/PRRSV (1).                                                                                                                                     |
| Quadruple        | 10              | PCV2/PCV3/PRRSV/PPV3 (1), PCV2/PCV3/PPV1/PPV3 (1), PCV2/PCV3/PPV1/PPV5 (1), PCV2/PCV3/PPV2/PPV3 (1), PCV2/PCV3/PPV3/PPV6 (1), PCV2/PRRSV/PPV1/PPV5 (1), PCV2/PRRSV/PPV3/PPV5 (1), PCV3/PRRSV/PPV3/PPV5 (1), PCV3/PRRSV/PPV3/PPV6 (1), PPV3/PPV4/PPV5/PPV6 (1).                         |
| Quintuple        | 9               | PCV2/PCV3/PRRSV/PPV1/PPV2 (1), PCV2/PCV3/PRRSV/PPV1/PPV3 (1), PCV2/PCV3/PRRSV/PPV1/PPV6 (1), PCV2/PCV3/PRRSV/PPV3/PPV5 (1), PCV2/PCV3/PRRSV/PPV3/PPV6 (1), PCV2/PRRSV/PPV1/PPV3/PPV5 (1), PCV2/PRRSV/PPV3/PPV5/PPV6 (1), PCV2/PRRSV/PPV3/PPV4+PPV5 (1), PCV3/PRRSV/PPV3/PPV5/PPV6 (1). |
| Sextuple         | 6               | PCV2/PCV3/PRRSV/PPV1/PPV2/PPV3 (2), PCV2/PCV3/PRRSV/PPV1/PPV3/PPV4 (1), PCV2/PCV3/PRRSV/PPV1/PPV3/PPV5 (1), PCV2/PCV3/PRRSV/PPV3/PPV5/PPV6 (1), PCV2/PCV3/PRRSV/PPV2/PPV3+PPV5 (1).                                                                                                    |
| Septuple         | 2               | PCV2/PCV3/PRRSV/PPV3/PPV4/PPV5/PPV6 (1), PCV2/PRRSV/PPV2/PPV3/PPV4/PPV6/PPV7 (1).                                                                                                                                                                                                      |
| Octuple          | 1               | PCV2/PCV3/PRRSV/PPV1/PPV3/PPV4/PPV6/PPV7 (1).                                                                                                                                                                                                                                          |

**Table S4.** Viral infection and coinfections detected in gilts from 40 herds in Colombia.

| Infection status    | Number of sera | Viral coinfection (number of sera)                                                                                                                                                                                                                                                                                                                                                                                                                                                      |
|---------------------|----------------|-----------------------------------------------------------------------------------------------------------------------------------------------------------------------------------------------------------------------------------------------------------------------------------------------------------------------------------------------------------------------------------------------------------------------------------------------------------------------------------------|
| No infection        | 0              | -                                                                                                                                                                                                                                                                                                                                                                                                                                                                                       |
| Single infection    | 39             | PRRSV (14), PPV3 (9), PCV2 (7), PCV3 (4), PPV5 (3) PPV1 (2).                                                                                                                                                                                                                                                                                                                                                                                                                            |
| Double infection    | 69             | PCV2/PRRSV (21), PCV2/PPV6 (7), PCV2/PCV3 (6), PRRSV/PPV1 (6), PRRSV/PPV3 (6), PPV1/PPV3 (4), PRRSV/PPV5 (3), PCV3/PRRSV (2), PCV2/PPV1 (2), PCV2/PPV3 (2), PCV2/PPV5 (2), PCV3/PPV2 (2), PPV3/PPV6 (2), PCV2/PPV4 (1), PCV3/PPV3 (1), PPV2/PPV3 (1), PPV3/PPV5 (1).                                                                                                                                                                                                                    |
| Triple infection    | 64             | PCV2/PRRSV/PPV3 (9), PCV2/PRRSV/PPV5 (9), PCV2/PCV3/PRRSV (5), PCV3/PRRSV/PPV3 (6), PCV2/PCV3/PPV1 (4), PCV2/PRRSV/PPV2 (4), PRRSV/PPV2/PPV3 (4), PRRSV/PPV3/PPV5 (4), PCV2/PRRSV/PPV1 (3), PCV2/PPV3/PPV6 (3), PCV3/PRRSV/PPV6 (2), PCV2/PCV3/PPV2 (1), PCV2/PCV3/PPV3 (1), PCV2/PCV3/PPV5 (1), PCV2/PRRSV/PPV6 (1), PCV2/PPV1/PPV5 (1), PCV2/PPV3/PPV5 (1), PCV3/PRRSV/PPV2 (1), PCV3/PRRSV/PPV5 (1), PCV3/PPV1/PPV3 (1), PCV3/PPV2/PPV3 (1), PCV3/PPV3/PPV5 (1), PCV3/PPV3/PPV6 (1). |
| Quadruple infection | 36             | PCV3/PRRSV/PPV3/PPV6 (9), PCV2/ PRRSV/PPV3/PPV5 (6), PCV2/PCV3/PRRSV/PPV3 (3), PCV2/PCV3/PRRSV/PPV5 (3), PCV2/PCV3/PRRSV//PPV6 (2), PRRSV/PPV1/PPV3/PPV6 (2), PCV2/PCV3/PRRSV/PPV1 (1), PCV2/ PRRSV/PPV1/PPV5 (1), PCV2/ PRRSV/PPV1/PPV6 (1), PCV2/PRRSV/PPV2/PPV3 (1), PCV2/PRRSV/PPV3/PPV4 (1), PCV2/PRRSV/PPV4/PPV6 (1), PCV3/PRRSV/PPV1/PPV5 (1), PCV3/PPV1/PPV3/PPV4 (1), PRRSV/PPV4/PPV5/PPV6 (1), PPV3/PPV4/PPV5/PPV6 (1).                                                       |
| Quintuple infection | 12             | PCV2/PCV3/PRRSV/PPV3/PPV6 (2), PCV2/PCV3/PRRSV/PPV5/PPV6 (2), PCV2/PRRSV/PPV1/PPV3/PPV4 (1), PCV2/PRRSV/PPV1/PPV3/PPV5 (1), PCV2/PRRSV/PPV1/PPV3/PPV6 (1), PCV2/PRRSV/PPV2/PPV3/PPV4 (1), PCV2/PRRSV/PPV4/PPV6/PPV7 (1), PCV3/PRRSV/PPV1/PPV3/PPV6 (1), PCV3/PRRSV/PPV2/PPV3/PPV5 (2), PCV3/PRRSV/PPV3/PPV5/PPV6 (1).                                                                                                                                                                   |
| Sextuple infection  | 3              | PCV2/PCV3/PRRSV/PPV1/PPV3/PPV6 (1), PCV2/PCV3/PRRSV/PPV2/PPV3/PPV5 (1), PCV2/PRRSV/PPV3/PPV4/PPV6/PPV7 (1)                                                                                                                                                                                                                                                                                                                                                                              |
| Septuple infection  | 1              | PCV2/PCV3/PRRSV/PPV1/PPV3/PPV6/PPV7 (1).                                                                                                                                                                                                                                                                                                                                                                                                                                                |
